# Supplementary material for: How has life expectancy without functional limitations developed in Germany? An analysis with data from the German Ageing Survey (DEAS)
Source: Bundesgesundheitsblatt Gesundheitsforschung Gesundheitsschutz. 2024 Apr 22;67(5):564–71. [Article in German] doi: 10.1007/s00103-024-03875-9 (PMC11093863; doi:10.1007/s00103-024-03875-9)
Supplement: Supplementary file 1 [file 103_2024_3875_MOESM1_ESM.pdf]

## Onlinematerial

zum Artikel: „Wie hat sich die Lebenserwartung ohne funktionelle Einschränkungen in Deutschland entwickelt? Eine Analyse mit Daten des Deutschen Alterssurveys (DEAS)“

Bundesgesundheitsblatt Ausgabe 5/2024

Tabelle A1: DEAS-Fallzahlen für 2008, 2014 und 2020/21 nach Altersgruppen und Geschlecht

| Altersgruppe   | DEAS 2008 |        | DEAS 2014 |        | DEAS 2020/21 |        |
|----------------|-----------|--------|-----------|--------|--------------|--------|
|                | Männer    | Frauen | Männer    | Frauen | Männer       | Frauen |
| <b>46-49J.</b> | 511       | 475    | 627       | 567    | 249          | 239    |
| <b>50-54J.</b> | 783       | 652    | 980       | 847    | 421          | 370    |
| <b>55-59J.</b> | 530       | 465    | 671       | 668    | 473          | 503    |
| <b>60-64J.</b> | 422       | 463    | 670       | 597    | 402          | 373    |
| <b>65-69J.</b> | 599       | 500    | 538       | 532    | 341          | 277    |
| <b>70-74J.</b> | 444       | 479    | 581       | 508    | 254          | 320    |
| <b>75-79J.</b> | 280       | 309    | 474       | 584    | 169          | 198    |
| <b>80-84J.</b> | 190       | 256    | 247       | 347    | 232          | 296    |
| <b>85-89J.</b> | 20        | 34     | 115       | 180    | 76           | 134    |
